# Supplementary material
Source: Springer Nature journal article supplement (https://www.springermedizin.de/resource/supplementary/12936_2005_156_MOESM1_ESM.pdf/9547014)

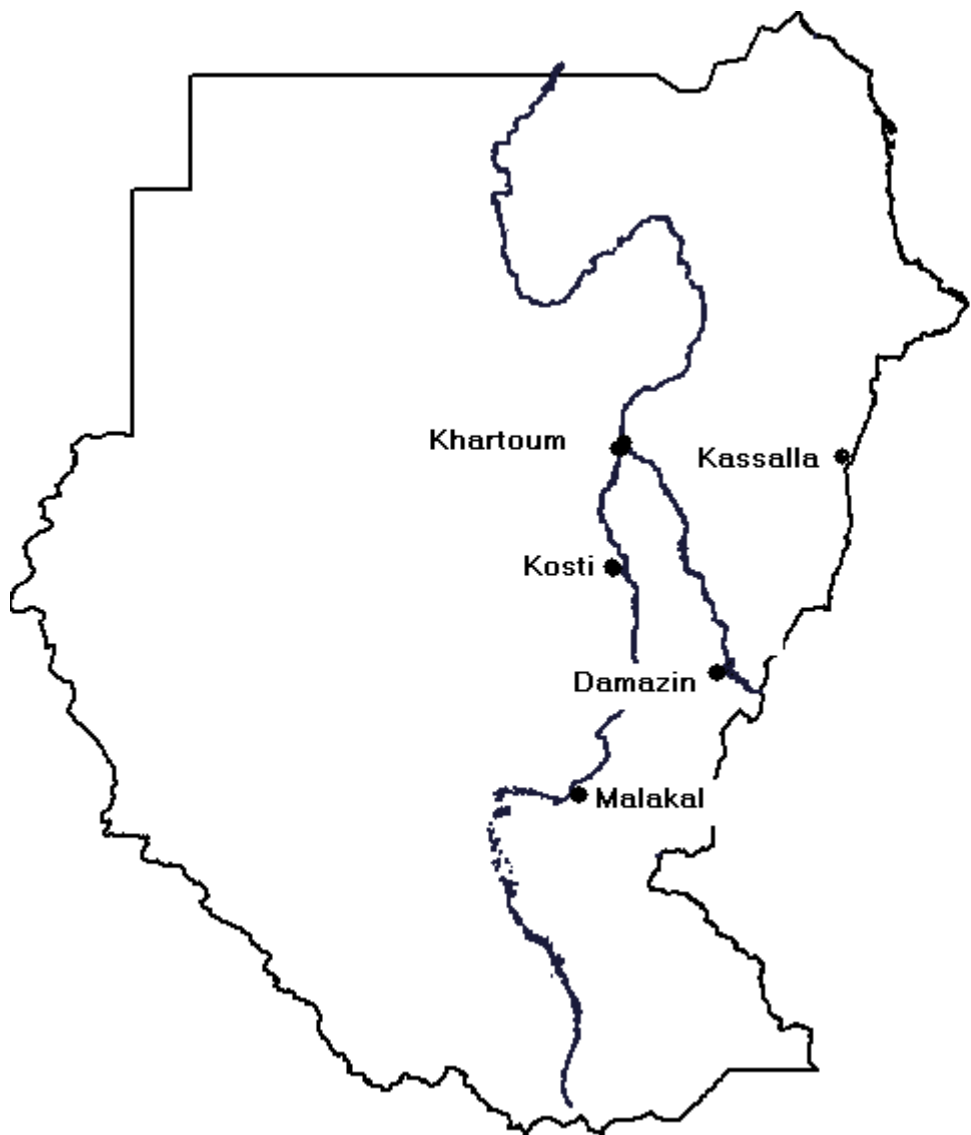

Khartoum

Kassalla

Kosti

Damazin

Malakal

Supplement: MOESM1 [file 9547014]
